# Supplementary material
Source: PubMed Central journal article supplement (PMC10470513)
Supplement: mbio.01046-23-s0004.pdf [file mbio.01046-23-s0004.pdf]

A

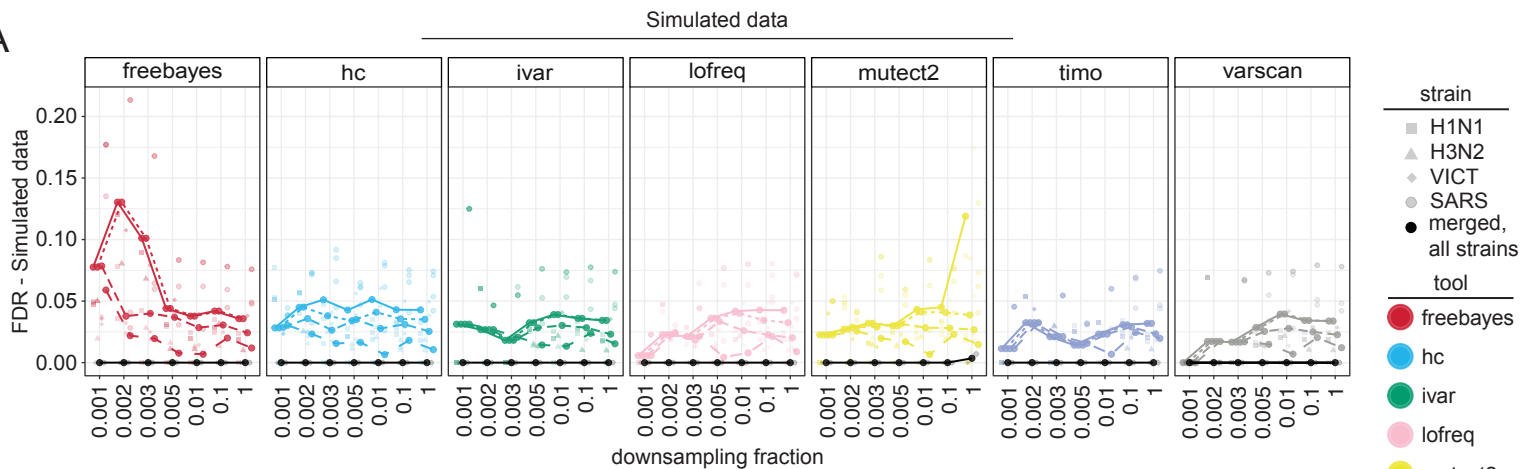

B

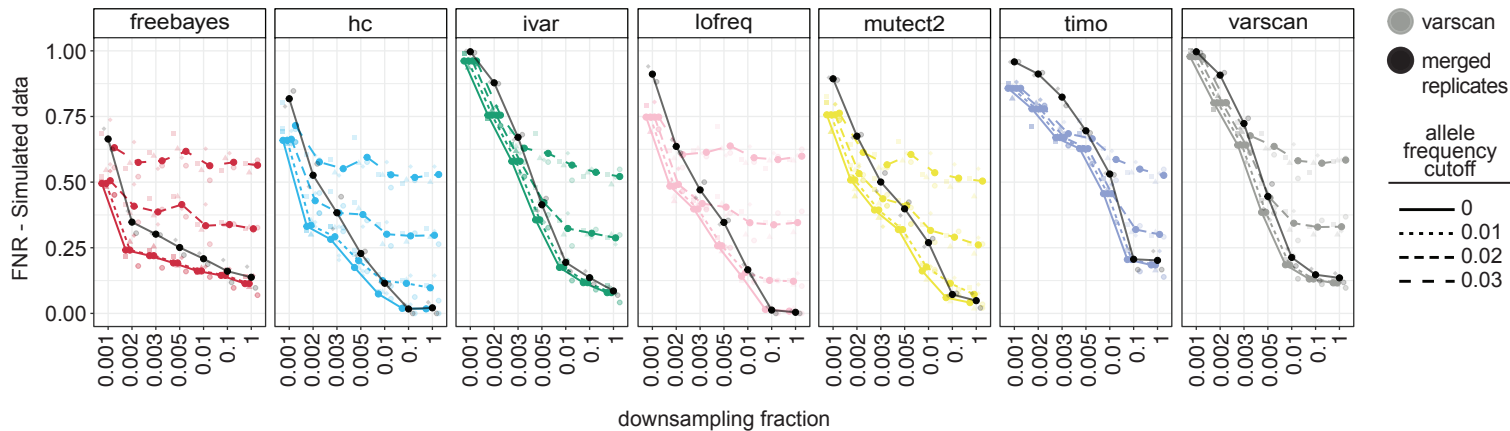

**Figure S4. Effect of frequency cutoffs and sequencing replicates on false discovery rate and false negative rate in simulated data. (A)** False discovery rate (FDR, y-axis) of simulated data across downsampling fractions (x-axis) using either single replicate data (colored points and lines) with applied frequency cutoffs (line type) or merged two replicate data without cutoffs (solid black points and lines). Background points represent values for individual viruses. Lines represent mean across viruses. Color represents the variant caller used. **(B)** False negative rate (FNR, y-axis) of simulated data across downsampling fractions (x-axis) using either single replicate data (colored points and lines) with applied frequency cutoffs (line type) or merged two replicate data without cutoffs (solid black points and lines) as above. Variants below the applied frequency cutoff are filtered out and considered false negatives.
