# Supplementary material
Source: PubMed Central journal article supplement (PMC10470513)
Supplement: mbio.01046-23-s0005.pdf [file mbio.01046-23-s0005.pdf]

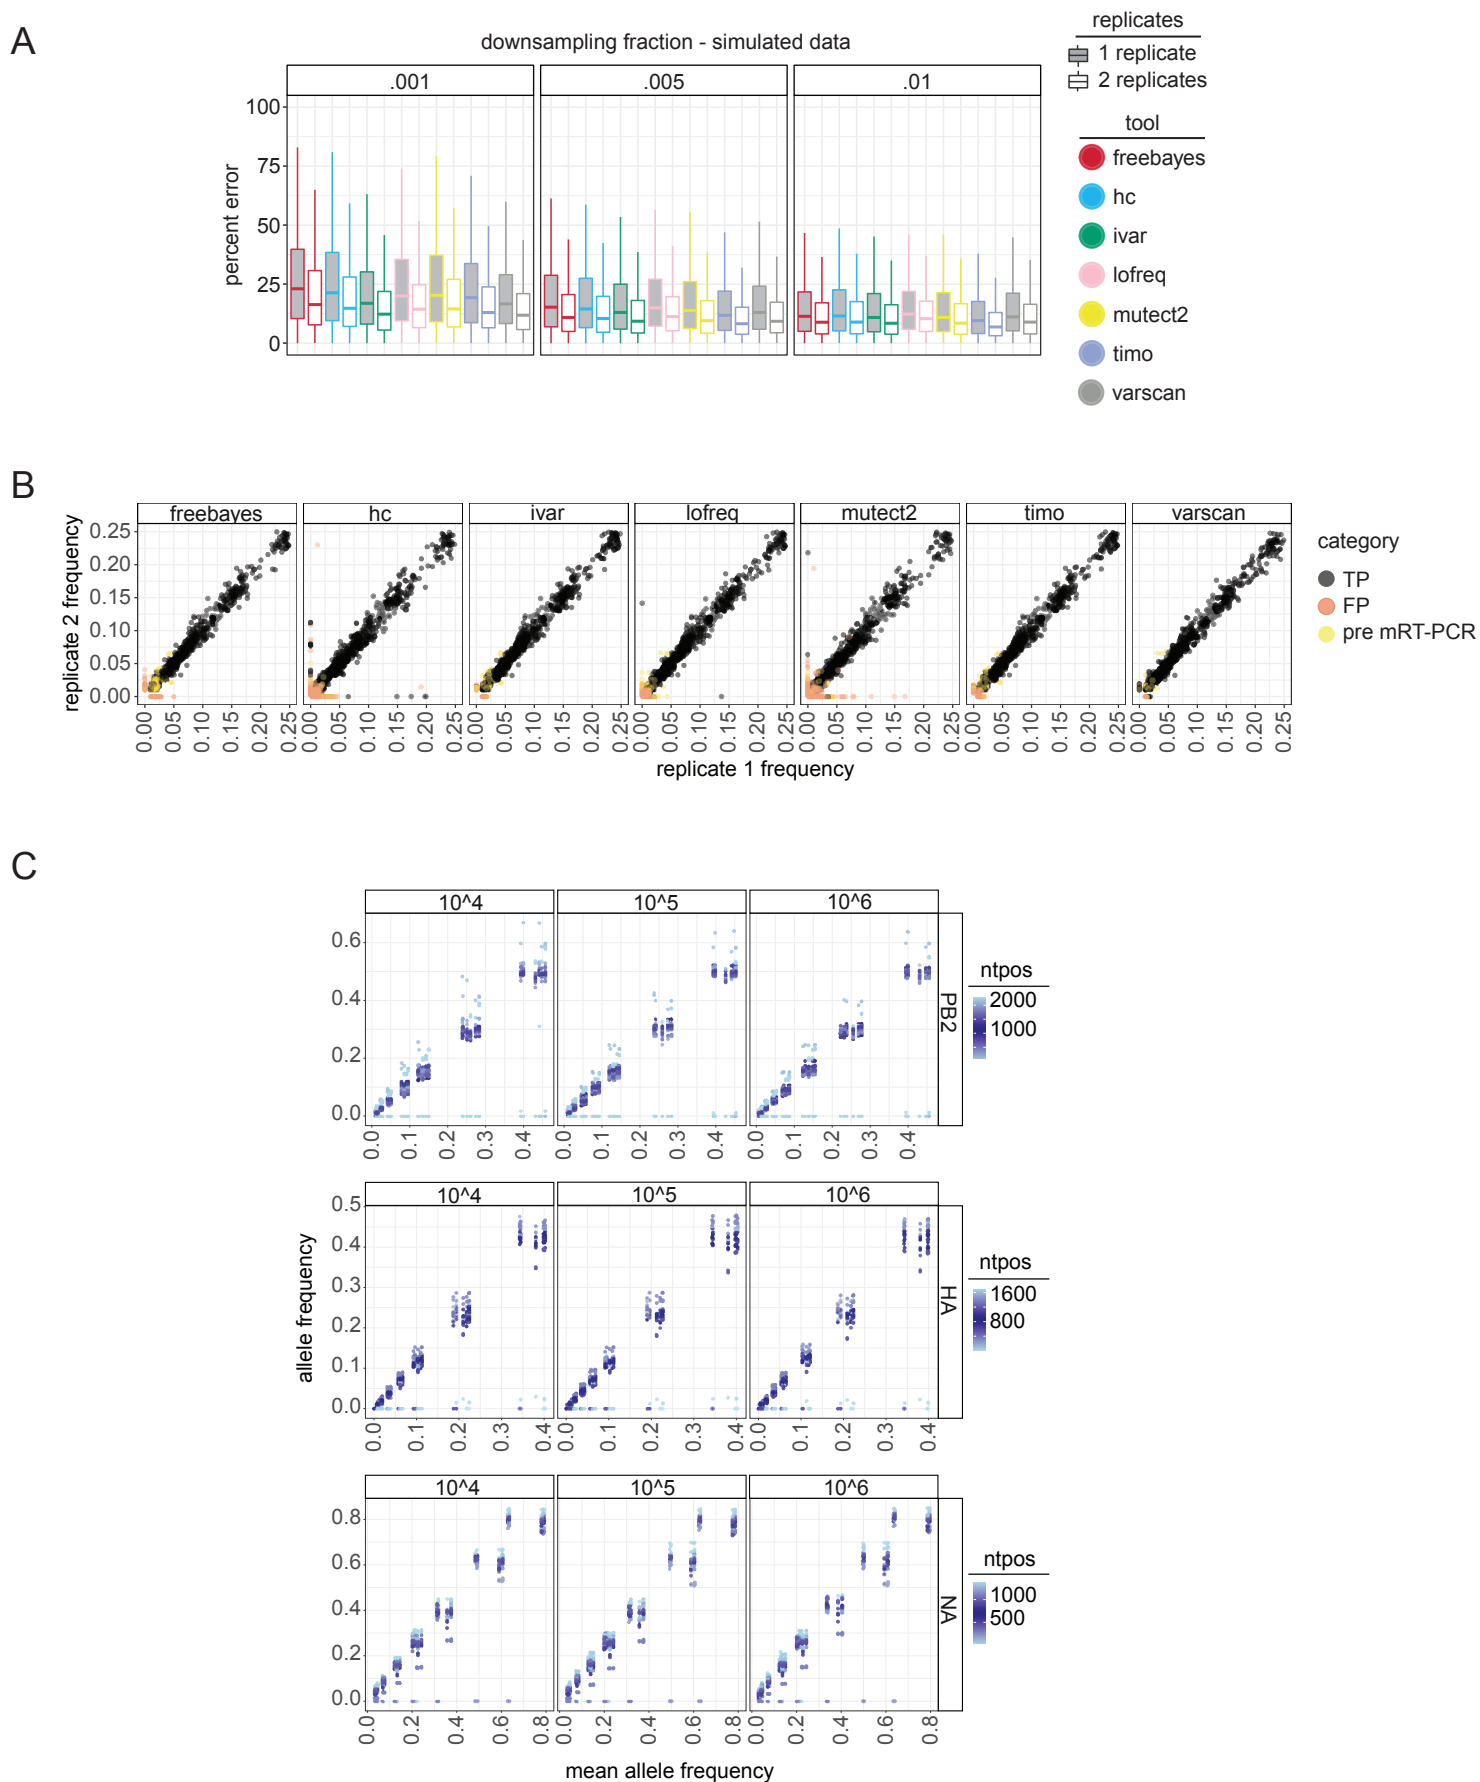

**Figure S5. Effect of sequencing replicates and genome location on the accuracy of allele frequency estimation.**

**(A)** Percent error ( $(|(\text{observed}-\text{expected})|/\text{expected}) \times 100$ ) of single replicate (grayed boxes) or merged replicate (open boxes) SNVs in simulated influenza A data across downsampling fractions (0.001, 0.005, and 0.01). Color represents the variant caller used. **(B)** Scatter plot showing the frequency of variants in synthetic influenza data across sequencing replicates with frequency in replicate 1 on the x-axis and frequency in replicate 2 on the y-axis. Color represents the SNV type. **(C)** Concordance between the output allele frequency (y-axis) and mean allele frequency (x-axis) across nucleotide position and copy number ( $10^4 - 10^6$ ) on each synthetic influenza gene. Output from both replicates is shown. Color represents nucleotide position, with darker colors near the ends of the gene segments.
